# Supplementary material
Source: PubMed Central journal article supplement (PMC5350076)

Figure S1

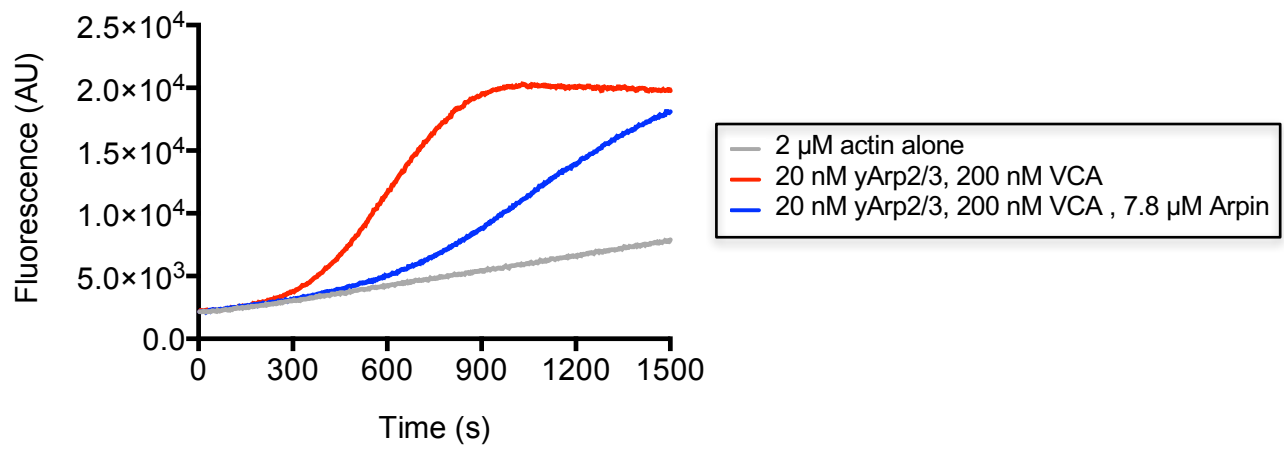

Figure S2

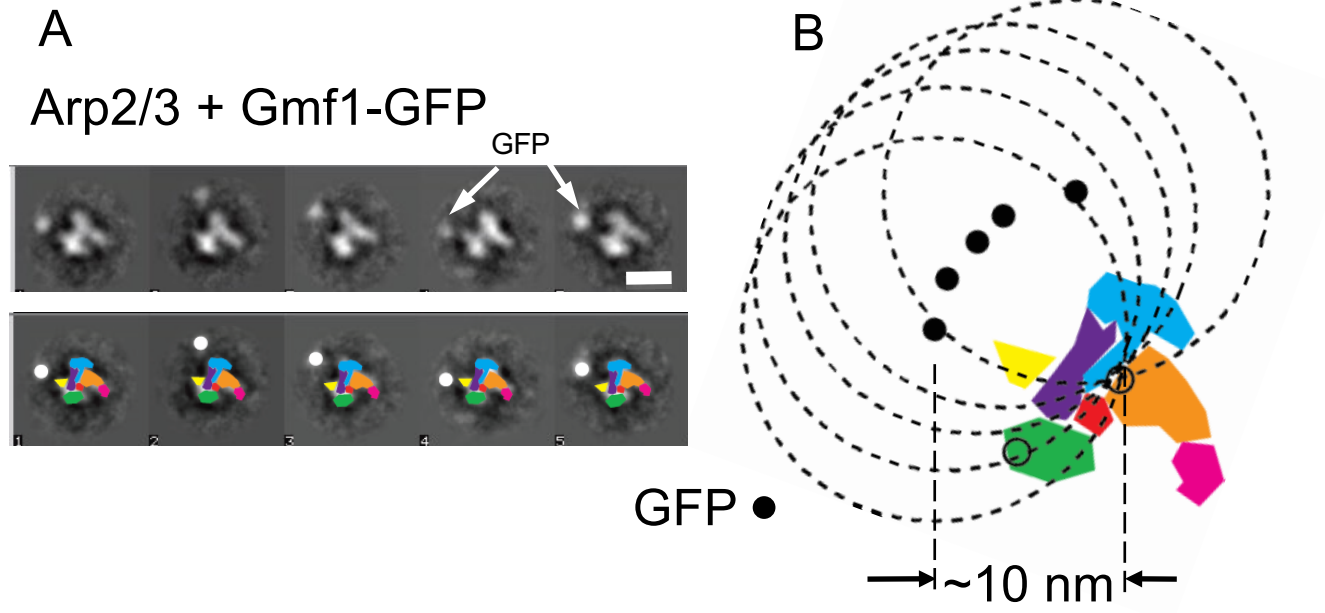

Figure S3

**Difference maps**

Arp2/3

Arp2/3 + Arpin

Arp2/3 + Gmf1  
'standard open'

Arp2/3 + Gmf1  
'new open'

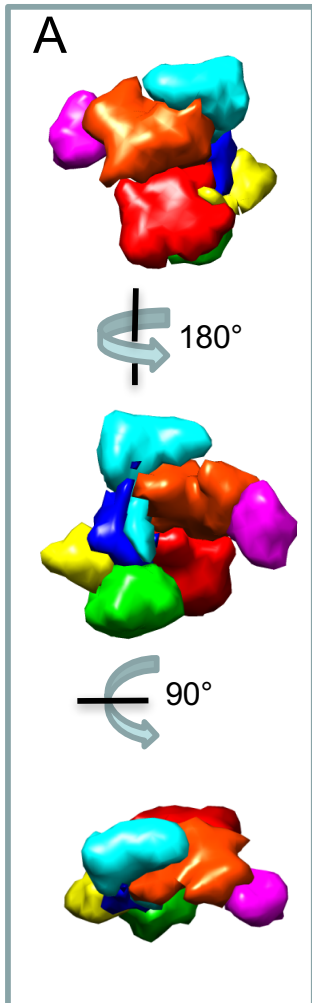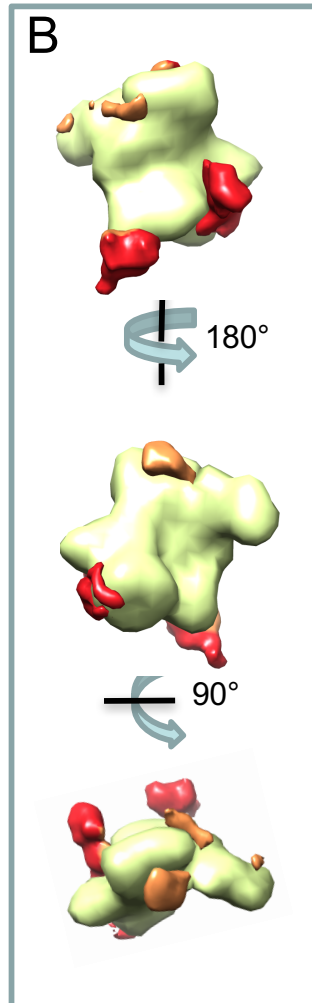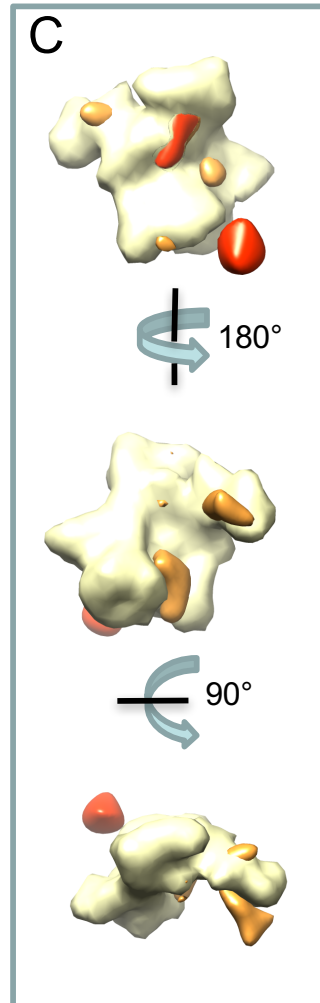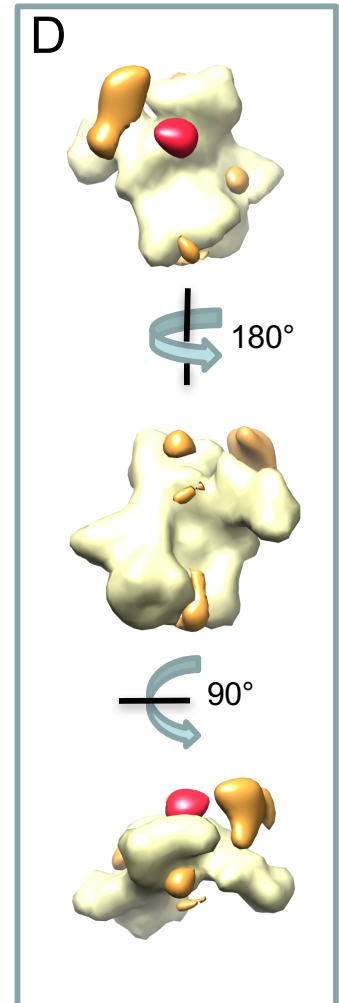

Figure S4

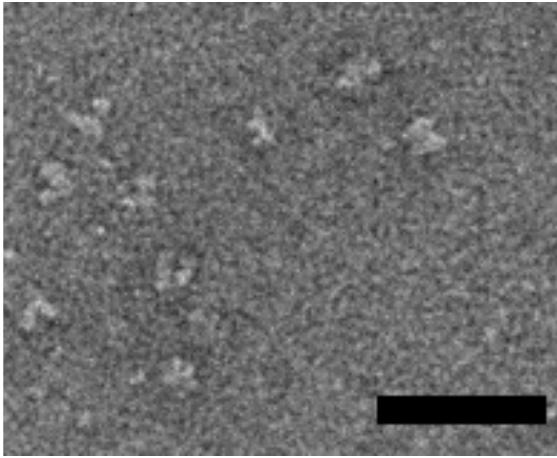

*Arp2/3*

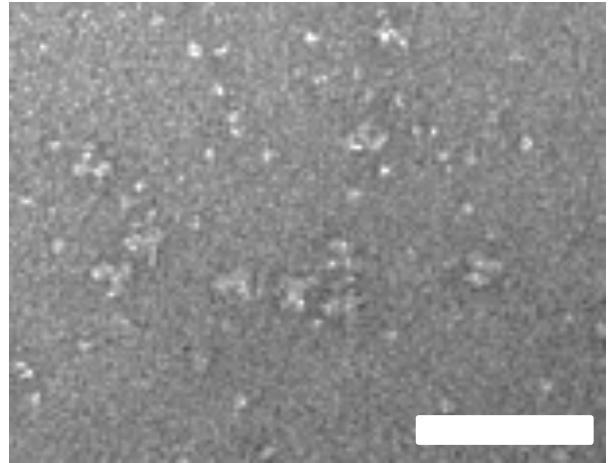

*Arp2/3 + Arpin*

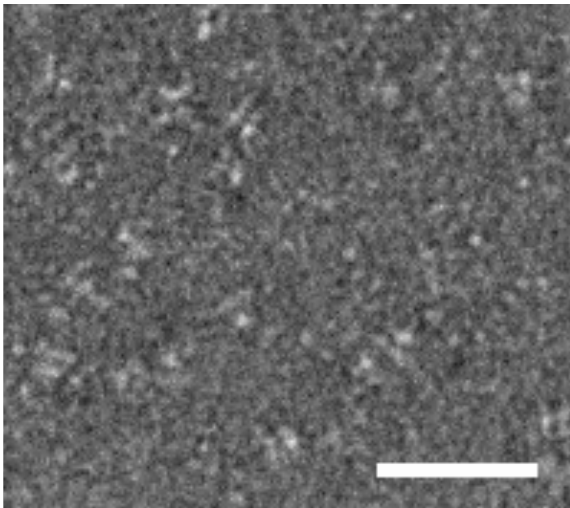

*Arp2/3 + Crn1-GST*

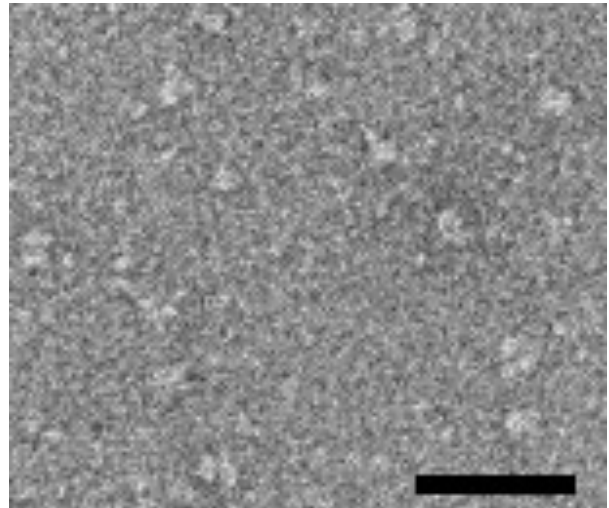

*Arp2/3 + Gmf1*

Figure S5

Arp2/3 + Gmf1

Arp2/3 + Arpin

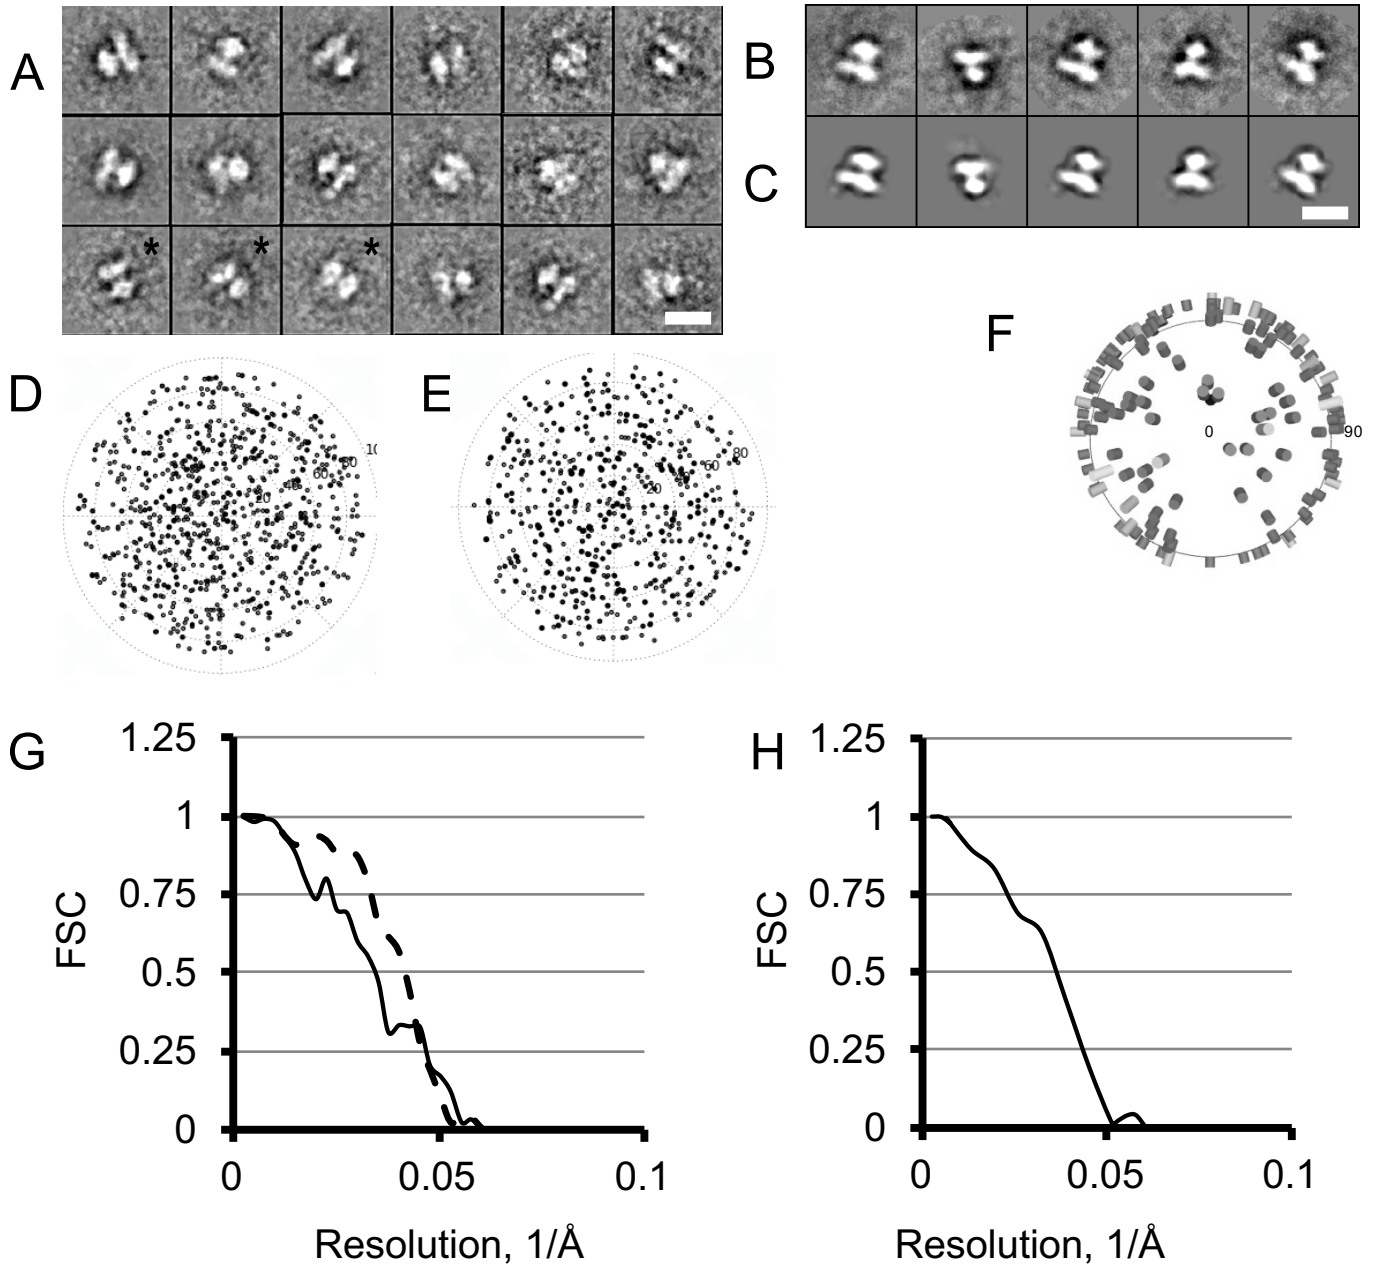

Supplement: NIHMS850600-supplement-02.pdf [file NIHMS850600-supplement-02.pdf]
