# Supplementary material
Source: PubMed Central journal article supplement (PMC5350076)

Figure S6

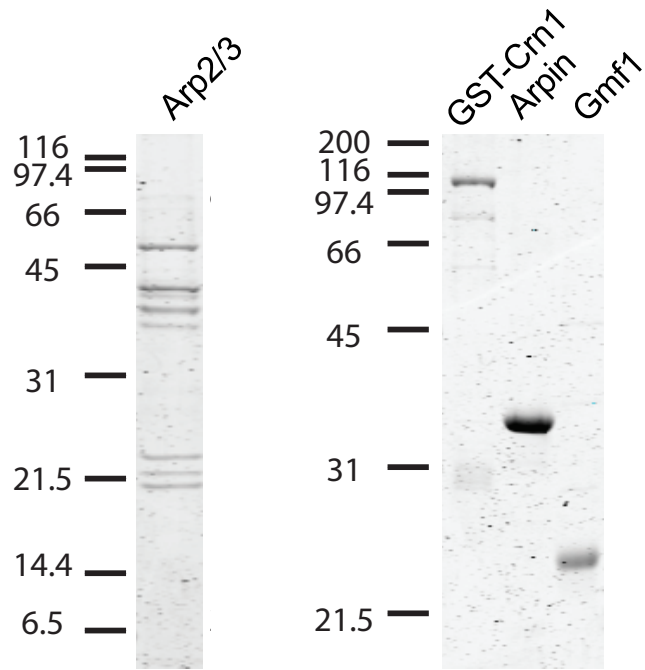

Supplement: NIHMS850600-supplement-Figures_S6.pdf [file NIHMS850600-supplement-Figures_S6.pdf]
